# Supplementary material for: The construction of a vanadium-doped polysulfide iron bimetallic active center for enhanced photocatalytic nitrogen fixation
Source: Royal Society of Chemistry journal article supplement (doi:10.1039/d3cy00744h), 2023-01-01
Supplement: d3cy00744h1.pdf [file d3cy00744h1.pdf]

## Supplementary Data

### **The construction of vanadium-doped polysulfide iron bimetallic active center for enhanced photocatalytic nitrogen fixation**

Wei Cai, Kang Li, Jianuan Wen, Zhicheng Zhang, Qin Zhong and Hongxia Qu\*

Department of Chemical Engineering and Technology, School of Chemistry and Chemical Engineering, Nanjing University of Science and Technology, Nanjing, Jiangsu 210094, PR China.

\* Corresponding author.

E-mail addresses: qhx@mail.njust.edu.cn (H. Qu)

## Characterization

The XRD patterns were obtained by an X-ray diffractometer (XRD, Purkinje XD-3, Cu K $\alpha$  radiation,  $\lambda=0.15418$  nm). The transmission electron microscopy (TEM) was performed on a Tecnai G2 F30 S-TWIN instrument with an acceleration voltage of 300 kV. Fourier transform infrared (FT-IR) spectroscopy was recorded on a Nicolet-iS10 spectrometer (32 scans). The composition and surface state of the samples were verified by X-ray photoelectron spectroscopy (XPS, PHI QUANTERA II, Al K $\alpha$  X-ray radiation). The binding energy 284.8 eV was used as the carbon (C–C) correction value. UV–vis diffuse reflectance spectroscopy (DRS) spectra were recorded on a Shimadzu UV-2600 spectrophotometer. N<sub>2</sub>-temperature programmed desorption (N<sub>2</sub>-TPD) measurements were performed on a ChemiSorb 2040 instrument. Mott–Schottky plots were measured on an electrochemical workstation (CHI 760E, three-electrode system in 0.5 M Na<sub>2</sub>SO<sub>4</sub> aqueous solution as an electrolyte). The detection of NO<sub>3</sub><sup>−</sup>/NO<sub>2</sub><sup>−</sup> conducted using Ion-Chromatography (IC, DIONEX ICS-600, Thermo). The working electrode was fabricated using a drop-casting method. 5 mg of the photocatalysts were dispersed in 1 mL ethanol containing 40  $\mu$ L Nafion solution (5%) by sonication for 30 min. Then, the dispersive suspension was drop-cast onto a pretreated fluorine-doped tin oxide (FTO) glass substrate, and dried at 60 °C in air for 2 h to improve the adhesion. The LC-MS analysis was performed on a high-performance liquid chromatography-mass spectrometry with an Agilent 1290II-6460 Liquid chromatography and waters BEH C18 column (2.1 mm  $\times$  100 mm, 1.7  $\mu$ m). The mobile phase comprised (A) aqueous formic acid (0.1%, v/v) and (B) acetonitrile. Drying gas flow was 12 L $\cdot$ min<sup>−1</sup>. Gas temperature was 350 °C and Capillary voltage was 3200V.

In-situ DRIFT experiments were performed on a Nicolet IZ10 spectrometer equipped with a Harrick Scientific DRIFT cell and a Nicolet IZ10 detector. Prior to test, photocatalysts were pretreated at 150 °C under N<sub>2</sub> flow (30 mL/min) for 2 h and then cooled to 35 °C to get the background spectrum. Next, N<sub>2</sub> (30 mL/min) with bubbled solution (H<sub>2</sub>O:CH<sub>3</sub>OH=4:1) was introduced into the chamber at 35 °C and reacted at

dark for 30 min for adsorption. Then, the light source was turned on to monitor the produced intermediates for another 1 h.

**Mott-Schottky plots** are analyzed by eq. (1, 2):

$$\frac{1}{C^2} = \frac{2}{e\epsilon\epsilon_0 N_D} \left( E - E_{fb} - \frac{KT}{e} \right) \quad (1)$$

$$N_D = \frac{2}{e\epsilon\epsilon_0} \left[ \frac{d\left(\frac{1}{C^2}\right)}{d(E)} \right]^{-1} \quad (2)$$

Here, C is the differential capacitance of the Helmholtz layer, e represents the charge of single electron ( $1.602 \times 10^{-19}$  C),  $\epsilon$  is the dielectric of CN,  $\epsilon_0$  is the vacuum permittivity ( $8.85 \times 10^{-14}$  F cm<sup>-1</sup>), E is the applied bias at the electrode, K is the Boltzmann constant ( $1.38 \times 10^{-23}$  J K<sup>-1</sup>), and T is the absolute temperature. Then the flat band potential is obtained by extrapolating the  $1/C^2$  value to the x-axis.

## **Photocatalytic nitrogen fixation**

The photocatalytic N<sub>2</sub> fixation was conducted in a 100 mL jacketed reactor with an external circulating water system, which controlled a certain reaction temperature. Briefly, 50 mg of the catalyst was dispersed in 50 mL methanol aqueous solution (20 vol%), and purity nitrogen gas was bubbled into the reaction solution with a flow rate of 30 mL min<sup>-1</sup>. A 300 W Xe lamp (PLS-SXE300/300UV, working current 15A, output light wavelength 200-2500nm) was turned on as a light source after stirring for 30 min in the dark. At given irradiation time intervals, 2 mL of the reaction solution was taken out and liquid sample was separated by centrifugation at 4200 rpm for 10 min. The

concentration of ammonia was determined by Nessler's reagent method (JB7478-87) with a UV-vis spectrophotometer (T6 New Century, Beijing). The ammonia concentration was calculated by ammonia nitrogen standard curve (Fig. S1). In order to verify that  $\text{NH}_3$  is produced from  $\text{N}_2$ , an experiment was performed by replacing  $\text{N}_2$  with Ar. The reaction conditions were the same as for NRR. Before starting the reaction, Ar was introduced in the dark for 1 h to drive off the dissolved nitrogen in the water to avoid the participation of the dissolved nitrogen in the NRR. An Ar atmosphere was then maintained over the solution.

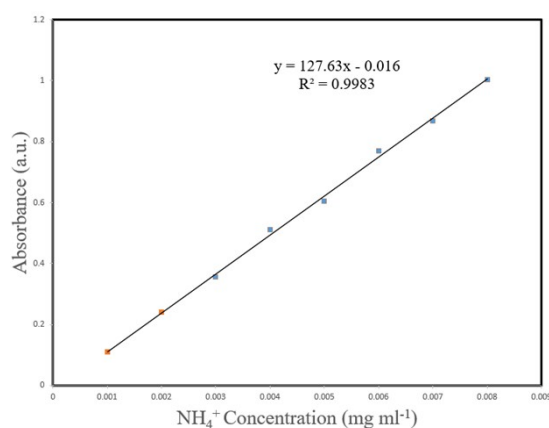

**Fig. S1.** Ammonia nitrogen standard curve.

## Isotopic Labeling Experiment

The isotopic labeling experiment was conducted in a 100 mL photoreactor. 50 mg of wet FeVS@g-C<sub>3</sub>N<sub>5</sub> photocatalyst was distributed on the bottom of the photoreactor. Before starting the reaction, Ar was introduced in the dark for 1 h to drive off the air, after which it is completely evacuated by a mechanical pump. Then, <sup>15</sup>N<sub>2</sub> or <sup>14</sup>N<sub>2</sub> gas was injected into the photoreactor, and the FeVS@g-C<sub>3</sub>N<sub>5</sub> photocatalyst was exposed to irradiation supplied by a 300 W Xe lamp. After 12 h of visible light irradiation, 5 mL

of deionized water was added into the photoreactor to form a mixture solution, which was centrifuged at 5000 rpm. The resulted solution was mixed with 0.2 mL of a phenol solution (1.2 g of phenol in 10 mL a 95% ethanol aqueous solution), 0.2 mL of a 0.5 g·L<sup>-1</sup> sodium nitroferricyanide dihydrate solution, and 0.7 mL of a NaClO solution (0.1 g of NaOH, 2 g sodium citrate, 1 mL of a 10 wt % NaClO solution in 10 mL of deionized water) and stirred for 1 h. The indophenol in the mixture solution was then analyzed by HPLC/MS (Agilent 1290II-6460) system with a waters BEH C 18 column [1].

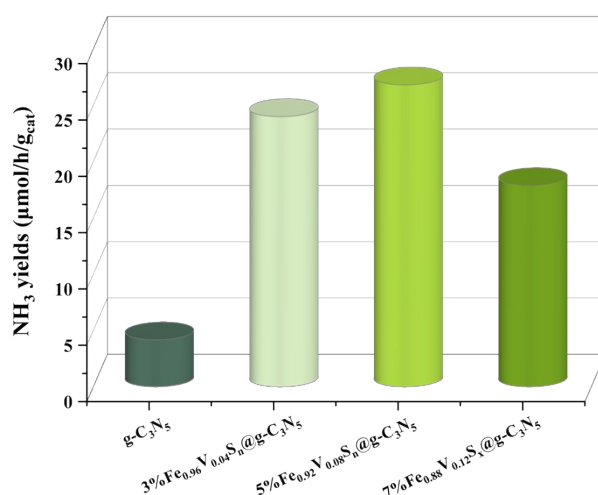

**Fig. S2.** NH<sub>3</sub> yields of samples with different polysulfide loadings.

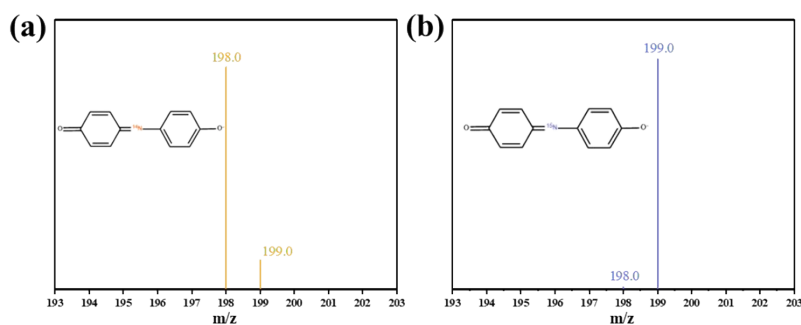

**Fig. S3.** Mass spectra of the product (indophenol) produced by reaction of phenol with NH<sub>3</sub> generated from photocatalytic (a) <sup>14</sup>N<sub>2</sub> or (b) <sup>15</sup>N<sub>2</sub> reduction. The inset is the chemical structure of the indophenol product, with m/z = 198.0 (indophenol containing <sup>14</sup>N) and m/z = 199.0 (indophenol containing <sup>15</sup>N).

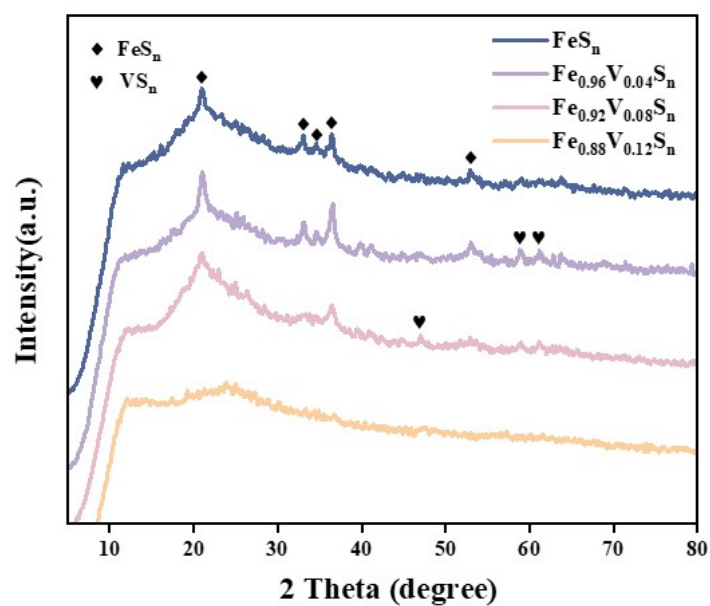

Fig. S4. XRD patterns of FeVS.

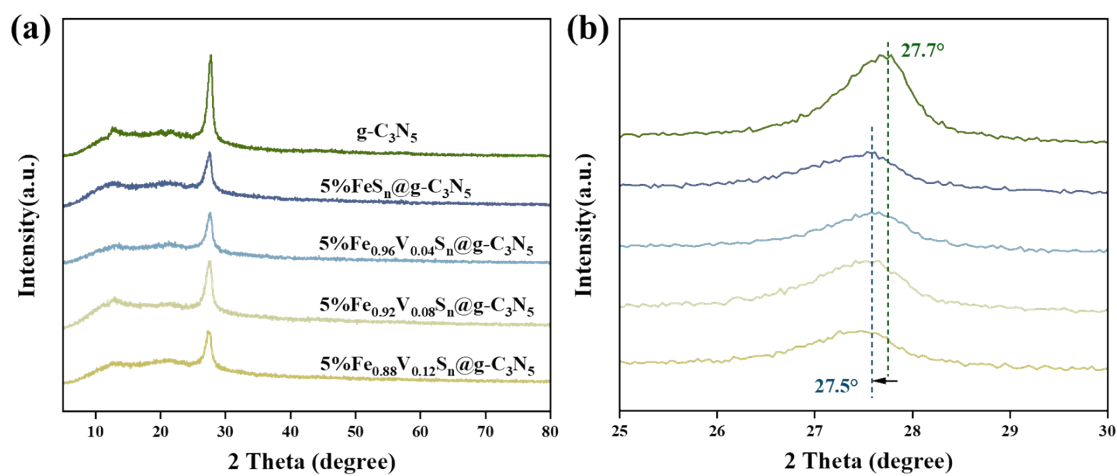

Fig. S5. XRD patterns of (a)  $g\text{-C}_3\text{N}_5$  and samples with different polysulfide loadings and (b) partial enlargement diagram of XRD patterns.

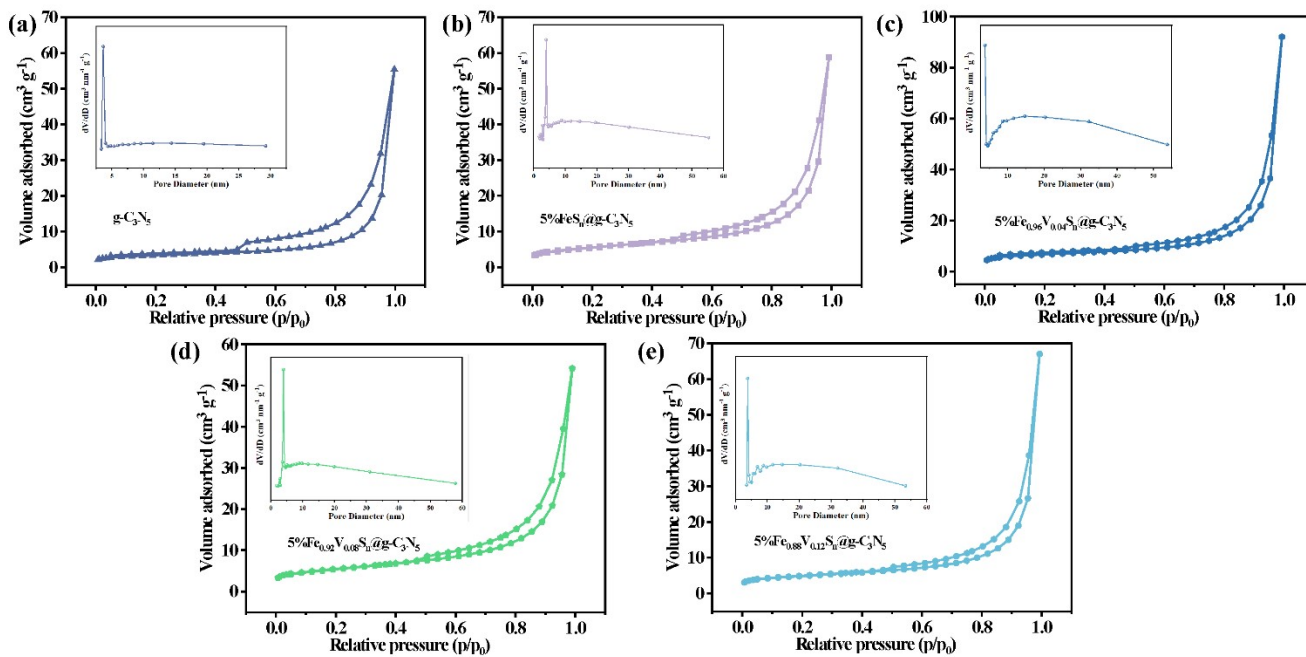

Fig. S6.  $N_2$  adsorption-desorption isotherms of all samples (Insert was the corresponding BJH mesopore size distributions).

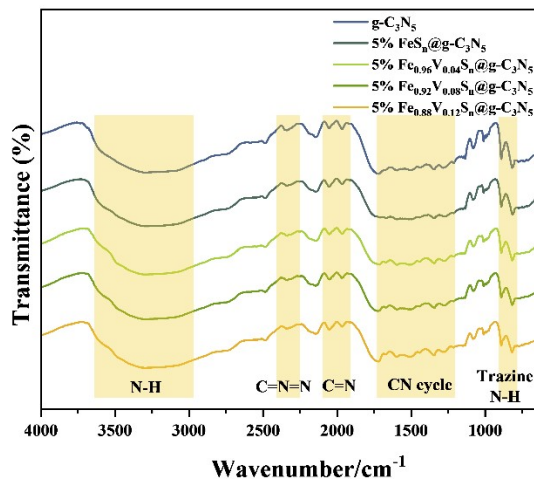

Fig. S7. FT-IR of all samples.

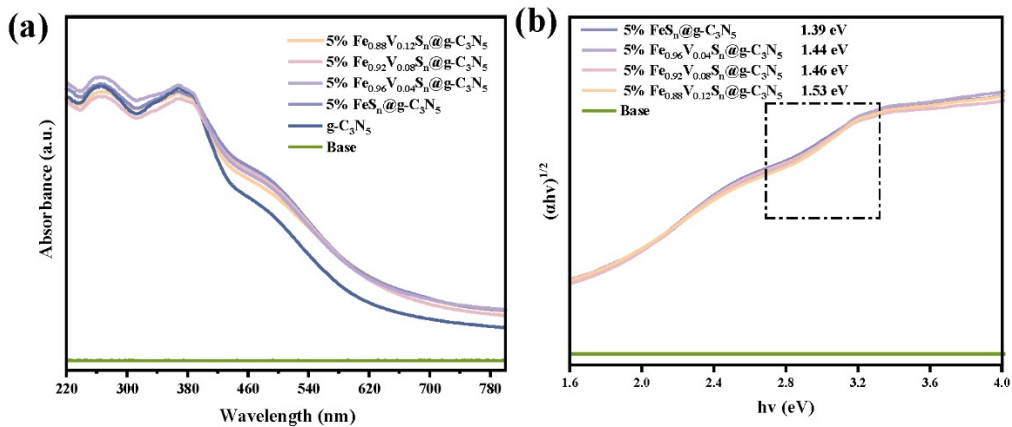

Fig. S8. (a) UV-vis DRS spectra and (b) tauc plots for samples.

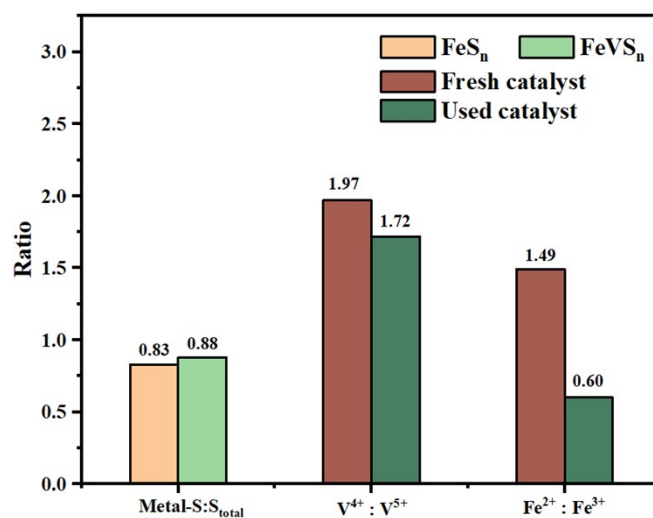

Fig. S9. XPS data analysis.

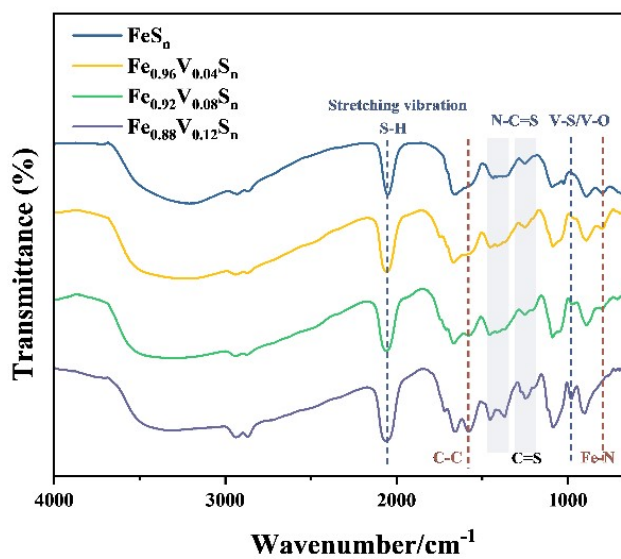

Fig. S10. FT-IR of FeVS.



**Tab. S1.** Performance comparison of the reported photocatalysts for NRR.

|                         | Photocatalyst                                                                       | Activity                                                                             | Light source  | Reference |
|-------------------------|-------------------------------------------------------------------------------------|--------------------------------------------------------------------------------------|---------------|-----------|
| This work               | FeVS@g-C <sub>3</sub> N <sub>5</sub>                                                | 1916.5 $\mu\text{mol}\cdot\text{h}^{-1}\cdot\text{g}_{\text{cat}}^{-1}$              | 300W Xe lamp  |           |
| Iron modified catalysts | FeN-CDs/TiO <sub>2</sub> @CN                                                        | 9.365 $\text{mg}\cdot\text{h}^{-1}\cdot\text{g}_{\text{cat}}^{-1}$                   | 300W Xe lamp  | [2]       |
|                         | GF (Fe <sub>2</sub> O <sub>3</sub> loaded g-C <sub>3</sub> N <sub>4</sub> )         | 47.9 $\text{mg}/\text{L}/\text{h}$                                                   | 300W Xe lamp  | [3]       |
|                         | Al-PMOF(Fe)                                                                         | 127 $\mu\text{g}\cdot\text{h}^{-1}\cdot\text{g}_{\text{cat}}^{-1}$                   | AM 1.5G       | [4]       |
|                         | Fe-Bi <sub>2</sub> MoO <sub>6</sub>                                                 | 106.5 $\mu\text{mol}\cdot\text{h}^{-1}\cdot\text{g}^{-1}$                            | 300W Xe lamp  | [5]       |
|                         | MIL-53(FeII/FeIII)                                                                  | 306 $\mu\text{mol}\cdot\text{h}^{-1}\cdot\text{g}^{-1}$                              | 300W Xe lamp  | [6]       |
|                         | Fe doped SrMoO <sub>4</sub>                                                         | 93.1 $\mu\text{mol}\cdot\text{h}^{-1}\cdot\text{g}^{-1}$                             | 300W Xe lamp  | [7]       |
| Carbon Nitride          | Ti <sub>3</sub> C <sub>2</sub> /N-defect g-C <sub>3</sub> N <sub>4</sub> nanosheets | 5.792 $\text{mg}\cdot\text{h}^{-1}\cdot\text{g}_{\text{cat}}^{-1}$                   | 300W Xe lamp  | [8]       |
|                         | C <sub>3</sub> N <sub>4</sub> /r-Ti <sub>3</sub> C <sub>2</sub> QD                  | 328.9 $\mu\text{mol}\cdot\text{h}^{-1}\cdot\text{g}^{-1}$                            | 300W Xe lamp  | [9]       |
|                         | B-doping in g-C <sub>3</sub> N <sub>4</sub> (BCN)                                   | 313.9 $\mu\text{mol}\cdot\text{h}^{-1}\cdot\text{g}^{-1}$                            | 250W Xe lamp  | [10]      |
|                         | Bi-defective g-C <sub>3</sub> N <sub>4</sub> (K and -C triple bond≡N) nanorod       | 23.5 $\text{mmol}/(\text{h}\cdot\text{g}_{\text{cat}})$                              | 300W Xe lamp  | [11]      |
|                         | B-C <sub>3</sub> N <sub>5</sub>                                                     | 421.18 $\mu\text{mol}\cdot\text{h}^{-1}\cdot\text{g}^{-1}$                           | 300W Xe lamp  | [12]      |
|                         | NV-g-C <sub>3</sub> N <sub>5</sub> /BiOBr                                           | 29.4 $\mu\text{g}\cdot\text{h}^{-1}\cdot\text{mg}^{-1}$                              | 300W Xe lamp  | [13]      |
| Sulfides                | g-C <sub>3</sub> N <sub>4</sub> /ZnMoCdS                                            | 3.5 $\text{mg}\cdot\text{L}^{-1}\cdot\text{h}^{-1}\cdot\text{g}_{\text{cat}}^{-1}$   | 500W Xe lamp  | [14]      |
|                         | g-C <sub>3</sub> N <sub>4</sub> /ZnSnCdS                                            | 7.543 $\text{mg}\cdot\text{L}^{-1}\cdot\text{h}^{-1}\cdot\text{g}_{\text{cat}}^{-1}$ | 250W Xe lamp  | [15]      |
|                         | MoS <sub>2</sub>                                                                    | 325 $\mu\text{mol}\cdot\text{h}^{-1}\cdot\text{g}^{-1}$                              | 500W Xe lamp  | [16]      |
|                         | WS <sub>2</sub> @TiO <sub>2</sub>                                                   | 1.39 $\text{mmol}\cdot\text{h}^{-1}\cdot\text{g}^{-1}$                               | AM 1.5G       | [17]      |
|                         | In <sub>2</sub> S <sub>3</sub> nanotubes                                            | 52.49 $\mu\text{mol}\cdot\text{h}^{-1}\cdot\text{g}^{-1}$                            | 300W Xe lamp  | [18]      |
|                         | Zn <sub>3</sub> In <sub>2</sub> S <sub>6</sub> nanosheets                           | 355.2 $\text{mg}\cdot\text{L}^{-1}\cdot\text{h}^{-1}\cdot\text{g}_{\text{cat}}^{-1}$ | 300W Xe lamp  | [19]      |
|                         | SV-1T-MoS <sub>2</sub> -/CdS                                                        | 8220.83 $\mu\text{mol}\cdot\text{L}^{-1}\cdot\text{h}^{-1}\cdot\text{g}^{-1}$        | AM 1.5G       | [20]      |
|                         | Pt/N-MoS <sub>2</sub>                                                               | 133.8 $\mu\text{mol}\cdot\text{h}^{-1}\cdot\text{g}_{\text{cat}}^{-1}$               | 300 W Xe lamp | [21]      |
| Nitrogenase Biomimetic  | TiO <sub>2</sub> /Mo <sub>2</sub> C@C                                               | 432 $\mu\text{g}\cdot\text{g}_{\text{cat}}^{-1}\cdot\text{h}^{-1}$                   | 300W Xe lamp  | [22]      |
|                         | UiO-66 (Zr-Hf)                                                                      | 351.8 $\mu\text{mol}\cdot\text{h}^{-1}\cdot\text{g}^{-1}$                            | 300W Xe lamp  | [23]      |
|                         | MIL-88A(Fe/Mo <sub>x</sub> )/Fe mesh                                                | $2.30 \times 10^{-2}$ $\mu\text{mol}/\text{cm}^2/\text{h}$                           | 350W Xe lamp  | [24]      |
|                         | Fe/Mo-BMWO                                                                          | 218.93 $\mu\text{mol}\cdot\text{h}^{-1}\cdot\text{g}^{-1}$                           | 300W Xe lamp  | [25]      |
|                         | Fe-MoTe <sub>2</sub>                                                                | 129.08 $\mu\text{mol}\cdot\text{h}^{-1}\cdot\text{g}^{-1}$                           | 300W Xe lamp  | [26]      |

## Reference

- [1] Yuan, Y.J.; Lu, N.; Bao, L.; Tang, R.; Zhang, F.G.; Guan, J.; Wang, H.D.; Liu, Q.Y.; Cheng, Q.; Yu, Z.T.; Zou, Z. SiP Nanosheets: A Metal-Free Two-Dimensional Photocatalyst for Visible-Light Photocatalytic H<sub>2</sub> Production and Nitrogen Fixation, *ACS Nano*, **2022**, *16*, 12174-12184.
- [2] Li, K.; Sun, C.; Chen, Z.; Qu, H.; Xie, H.; Zhong, Q. Fe-carbon dots enhance the photocatalytic nitrogen fixation activity of TiO<sub>2</sub>@CN heterojunction, *Chem. Eng. J.*, **2022**, *429*, 132440.
- [3] Liu, S.; Wang, S.; Jiang, Y.; Zhao, Z.; Jiang, G.; Sun, Z. Synthesis of Fe<sub>2</sub>O<sub>3</sub> loaded porous g-C<sub>3</sub>N<sub>4</sub> photocatalyst for photocatalytic reduction of dinitrogen to ammonia, *Chem. Eng. J.*, **2019**, *373*, 572-579.
- [4] Shang, S.; Xiong, W.; Yang, C.; Johannessen, B.; Liu, R.; Hsu, H.-Y.; Gu, Q.; Leung, M.K.H.; Shang, J. Atomically Dispersed Iron Metal Site in a Porphyrin-Based Metal–Organic Framework for Photocatalytic Nitrogen Fixation, *ACS Nano*, **2021**, *15*, 9670-9678.
- [5] Meng, Q.; Lv, C.; Sun, J.; Hong, W.; Xing, W.; Qiang, L.; Chen, G.; Jin, X. High-efficiency Fe-Mediated Bi<sub>2</sub>MoO<sub>6</sub> nitrogen-fixing photocatalyst: Reduced surface work function and ameliorated surface reaction, *Appl. Catal., B*, **2019**, *256*, 117781.
- [6] Zhao, Z.; Yang, D.; Ren, H.; An, K.; Chen, Y.; Zhou, Z.; Wang, W.; Jiang, Z. Nitrogenase-inspired mixed-valence MIL-53(Fell/Felll) for photocatalytic nitrogen fixation, *Chem. Eng. J.*, **2020**, *400*, 125929.
- [7] Luo, J.; Bai, X.; Li, Q.; Yu, X.; Li, C.; Wang, Z.; Wu, W.; Liang, Y.; Zhao, Z.; Liu, H. Band structure engineering of bioinspired Fe doped SrMoO<sub>4</sub> for enhanced photocatalytic nitrogen reduction performance, *Nano Energy*, **2019**, *66*, 104187.
- [8] Sun, C.; Chen, Z.; Cui, J.; Li, K.; Qu, H.; Xie, H.; Zhong, Q. Site-exposed Ti<sub>3</sub>C<sub>2</sub> MXene anchored in N-defect g-C<sub>3</sub>N<sub>4</sub> heterostructure nanosheets for efficient photocatalytic N<sub>2</sub> fixation, *Catalysis Science & Technology*, **2021**, *11*, 1027-1038.
- [9] Chang, B.; Guo, Y.; Liu, H.; Li, L.; Yang, B. Engineering a surface defect-rich Ti<sub>3</sub>C<sub>2</sub> quantum dots/mesoporous C<sub>3</sub>N<sub>4</sub> hollow nanosphere Schottky junction for efficient N<sub>2</sub> photofixation, *Journal of Materials Chemistry A*, **2022**, *10*, 3134-3145.
- [10] Wang, W.; Zhou, H.; Liu, Y.; Zhang, S.; Zhang, Y.; Wang, G.; Zhang, H.; Zhao, H. Formation of B<sub>2</sub>N<sub>2</sub>C Coordination to Stabilize the Exposed Active Nitrogen Atoms in g-C<sub>3</sub>N<sub>4</sub> for Dramatically Enhanced Photocatalytic Ammonia Synthesis Performance, *Small*, **2020**, *16*, 1906880.
- [11] Liu, G.; Tang, Z.; Gu, X.; Li, N.; Lv, H.; Huang, Y.; Zeng, Y.; Yuan, M.; Meng, Q.; Zhou, Y.; Wang, C. Boosting photocatalytic nitrogen reduction to ammonia by dual defective -CN and K-doping sites on graphitic carbon nitride nanorod arrays, *Appl. Catal., B*, **2022**, *317*, 121752.
- [12] Li, K.; Cai, W.; Zhang, Z.; Xie, H.; Zhong, Q.; Qu, H. Boron doped C<sub>3</sub>N<sub>5</sub> for photocatalytic nitrogen fixation to ammonia: The key role of boron in nitrogen activation and mechanism, *Chem. Eng. J.*, **2022**, *435*, 135017.
- [13] Li, M.; Lu, Q.; Liu, M.; Yin, P.; Wu, C.; Li, H.; Zhang, Y.; Yao, S. Photoinduced Charge Separation via the Double-Electron Transfer Mechanism in Nitrogen Vacancies g-C<sub>3</sub>N<sub>5</sub>/BiOBr for the Photoelectrochemical Nitrogen Reduction, *ACS Applied Materials & Interfaces*, **2020**, *12*, 38266-38274.
- [14] Zhang, Q.; Hu, S.; Fan, Z.; Liu, D.; Zhao, Y.; Ma, H.; Li, F. Preparation of g-C<sub>3</sub>N<sub>4</sub>/ZnMoCdS hybrid heterojunction catalyst with outstanding nitrogen photofixation performance under visible light via hydrothermal post-treatment, *Dalton Transactions*, **2016**, *45*, 3497-3505.
- [15] Hu, S.; Li, Y.; Li, F.; Fan, Z.; Ma, H.; Li, W.; Kang, X. Construction of g-C<sub>3</sub>N<sub>4</sub>/Zn<sub>0.11</sub>Sn<sub>0.12</sub>Cd<sub>0.88</sub>S<sub>1.12</sub> Hybrid Heterojunction Catalyst with Outstanding Nitrogen Photofixation Performance Induced by

- Sulfur Vacancies, *ACS Sustainable Chemistry & Engineering*, **2016**, *4*, 2269-2278.
- [16] Sun, S.; Li, X.; Wang, W.; Zhang, L.; Sun, X. Photocatalytic robust solar energy reduction of dinitrogen to ammonia on ultrathin MoS<sub>2</sub>, *Appl. Catal., B*, **2017**, *200*, 323-329.
- [17] Shi, L.; Li, Z.; Ju, L.; Carrasco-Pena, A.; Orlovskaya, N.; Zhou, H.; Yang, Y. Promoting nitrogen photofixation over a periodic WS<sub>2</sub>@TiO<sub>2</sub> nanoporous film, *Journal of Materials Chemistry A*, **2020**, *8*, 1059-1065.
- [18] He, Z.; Wang, Y.; Dong, X.; Zheng, N.; Ma, H.; Zhang, X. Indium sulfide nanotubes with sulfur vacancies as an efficient photocatalyst for nitrogen fixation, *RSC Advances*, **2019**, *9*, 21646-21652.
- [19] Han, H.; Yang, Y.; Liu, J.; Zheng, X.; Wang, X.; Meng, S.; Zhang, S.; Fu, X.; Chen, S. Effect of Zn Vacancies in Zn<sub>3</sub>In<sub>2</sub>S<sub>6</sub> Nanosheets on Boosting Photocatalytic N<sub>2</sub> Fixation, *ACS Applied Energy Materials*, **2020**, *3*, 11275-11284.
- [20] Sun, B.; Liang, Z.; Qian, Y.; Xu, X.; Han, Y.; Tian, J. Sulfur Vacancy-Rich O-Doped 1T-MoS<sub>2</sub> Nanosheets for Exceptional Photocatalytic Nitrogen Fixation over CdS, *ACS Applied Materials & Interfaces*, **2020**, *12*, 7257-7269.
- [21] Maimaitizi, H.; Abulizi, A.; Zhang, T.; Okitsu, K.; Zhu, J.-j. Facile photo-ultrasonic assisted synthesis of flower-like Pt/N-MoS<sub>2</sub> microsphere as an efficient sonophotocatalyst for nitrogen fixation, *Ultrason. Sonochem.*, **2020**, *63*, 104956.
- [22] Chen, L.C.; Shou, J.X.; Chen, Y.T.; Han, W.H.; Tu, X.W.; Zhang, L.P.; Sun, Q.; Cao, J.; Chang, Y.R.; Zheng, H. Efficient sunlight promoted nitrogen fixation from air under room temperature and ambient pressure via Ti/Mo composites, *Chem. Eng. J.*, **2023**, *451*, 138592.
- [23] An, K.; Ren, H.J.; Yang, D.; Zhao, Z.F.; Gao, Y.C.; Chen, Y.; Tan, J.D.; Wang, W.J.; Jiang, Z.Y. Nitrogenase-inspired bimetallic metal organic frameworks for visible-light-driven nitrogen fixation, *Applied Catalysis B-Environmental*, **2021**, *292*, 120167.
- [24] Wang, W.; Qu, J.; Li, C.; Guo, L.; Fang, X.; Chen, G.; Duan, J. "MoFe cofactor" inspired iron mesh-based MIL-88A(Fe/Mo) for bionic photocatalytic nitrogen fixation, *Molecular Catalysis*, **2022**, *532*, 112730.
- [25] Li, H.; Deng, H.; Gu, S.; Li, C.; Tao, B.; Chen, S.; He, X.; Wang, G.; Zhang, W.; Chang, H. Engineering of bionic Fe/Mo bimetallic for boosting the photocatalytic nitrogen reduction performance, *J. Colloid Interface Sci.*, **2022**, *607*, 1625-1632.
- [26] Li, H.; Gu, S.; Sun, Z.; Guo, F.; Xie, Y.; Tao, B.; He, X.; Zhang, W.; Chang, H. The in-built bionic "MoFe cofactor" in Fe-doped two-dimensional MoTe<sub>2</sub> nanosheets for boosting the photocatalytic nitrogen reduction performance, *Journal of Materials Chemistry A*, **2020**, *8*, 13038-13048.

**Tab. S2.** Specific surface area and pore structure of all samples.

|                                                                                        | <b>BET Surface Area (m<sup>2</sup>/g)</b> | <b>Pore volume (cm<sup>3</sup>/g)</b> | <b>Pore size (nm)</b> |
|----------------------------------------------------------------------------------------|-------------------------------------------|---------------------------------------|-----------------------|
| <b>g-C<sub>3</sub>N<sub>5</sub></b>                                                    | 11.2035                                   | 0.026281                              | 11.0568               |
| <b>5%FeS<sub>n</sub>@g-C<sub>3</sub>N<sub>5</sub></b>                                  | 19.3733                                   | 0.037705                              | 17.6748               |
| <b>5%Fe<sub>0.96</sub>V<sub>0.04</sub>S<sub>n</sub>@g-C<sub>3</sub>N<sub>5</sub></b>   | 22.3047                                   | 0.049250                              | 25.0848               |
| <b>5% Fe<sub>0.92</sub>V<sub>0.08</sub>S<sub>n</sub> @g-C<sub>3</sub>N<sub>5</sub></b> | 19.0077                                   | 0.038909                              | 17.4327               |
| <b>5% Fe<sub>0.88</sub>V<sub>0.12</sub>S<sub>n</sub> @g-C<sub>3</sub>N<sub>5</sub></b> | 16.2998                                   | 0.035489                              | 23.5731               |
